# Supplementary material for: Si-C is a method for inferring super-resolution intact genome structure from single-cell Hi-C data
Source: PubMed Central journal article supplement (PMC8285481; doi:10.1038/s41467-021-24662-z), 2021-07-16
Supplement: 41467_2021_24662_MOESM1_ESM.pdf [file 41467_2021_24662_MOESM1_ESM.pdf]

1           **Supplementary Information**

2

3           **Si-C method for inferring super-resolution intact genome structure from**  
4                                           **single-cell Hi-C data**

5

6                                   Luming Meng<sup>1\*</sup>, Chenxi Wang<sup>2</sup>, Yi Shi<sup>3</sup> and Qiong Luo<sup>2</sup>

7

8

9           <sup>1</sup>MOE Key Laboratory of Laser Life Science & Guangdong Provincial Key Laboratory of Laser  
10           Life Science, College of Biophotonics, South China Normal University, Guangzhou 510631,  
11           China

12           <sup>2</sup>Center for Computational Quantum Chemistry, School of Chemistry, South China Normal  
13           University, Guangzhou 510631, China

14           <sup>3</sup>Bio-X Institutes, Key Laboratory for the Genetics of Developmental and Neuropsychiatric  
15           Disorders, Shanghai Jiao Tong University, 1954 Huashan Road, Shanghai 200030, China

16

17           \*Corresponding author: menglum@scnu.edu.cn

18

19

20

21

22

23

24

25

26

27

28

29

30

31

32

33  
34  
35  
36  
37  
38  
39  
40  
41  
42  
43  
44  
45  
46  
47  
48  
49  
50  
51  
52  
53  
54  
55  
56  
57  
58  
59  
60  
61  
62  
63

## Table of contents

- Supplementary Note 1. The process of calculating 3D genome structure by NucDynamics**
- Supplementary Note 2. The process of calculating 3D genome structure by SCL**
- Supplementary Note 3. Computing resources**
- Supplementary Note 4. Validating inferred 3D structures using experimental Fluorescence *in situ* hybridization (FISH) data**
- Supplementary Note 5 Calculating root mean square deviation (RMSD)**
- Supplementary Note 6. Translating calculated 3D genome structure to distance matrix**
- Supplementary Note 7. Identifying boundaries of domain structures in distance matrix and boundaries of TADs in the populated Hi-C data**
- Supplementary Note 8. Calculation of chromosome intermingling**
- Supplementary Note 9. Identification of A/B compartment and features of large-scale 3D structure of the genome**
- Supplementary Note 10. Calculating gyration radius for chromatin region**
- Supplementary Table 1. Source list of experimental data and pre-calculation**
- Supplementary Figure 1. Correlations between distances measured by FISH probes and distances in the published NucDynamics 100-kb structures and in the Si-C 100-kb structures.**
- Supplementary Figure 2. Comparison of pairwise RMSD for different structure ensembles.**
- Supplementary Figure 3. Plot of the percentage of loops that are formed in the Si-C inferred structures of 10-kb resolution.**
- Supplementary Figure 4. Cross-sections of the Si-C intact genome 3D 10-kb resolution structures of Cell 2-8.**
- Supplementary Figure 5. Violin plot showing the proportion of each chromosome that intermingles with other chromosomes.**
- Supplementary Figure 6. The locations of centromeres and telomeres in the Si-C intact genome 3D 10-kb resolution structures for the all eight individual cells.**

64

### 65 **Supplementary Note 1. The process of calculating 3D genome structure by NucDynamics**

66 To reconstruct 3D genome structure ensemble of cell 1 for the comparisons shown in Fig. 2b and  
67 2c, we downloaded the source code of NucDynamics from the website  
68 [https://github.com/TheLaueLab/nuc\\_dynamics](https://github.com/TheLaueLab/nuc_dynamics). For the calculation to generate a 10-kb resolution  
69 structure ensemble including 20 conformations, we executed the NucDynamics software by the  
70 command as follows:

```
71 ./nuc_dynamics Cell_1_contact.ncc -m 20 -f pdb -o Cell_1_10kb_20replica.pdb -s 10.24 5.12  
72 2.56 1.28 0.64 0.32 0.16 0.08 0.04 0.02 0.01 -cpu 20
```

73 where Cell\_1\_contact.ncc is the Hi-C data of Cell 1 that is the exactly same data used for the  
74 structure determination of the Si-C method. Because a hierarchical protocol is employed in the  
75 NucDynamics framework, calculations were performed at 10240-kb, 5120-kb, 2560-kb, 1280-kb,  
76 640-kb, 320-kb, 160-kb, 80-kb, 40-kb, 20-kb and finally 10-kb resolution. The values in the list  
77 “10.24 5.12 2.56 1.28 0.64 0.32 0.16 0.08 0.04 0.02 0.01” in the command represents the  
78 mentioned resolutions. For instance, the value of 10.24 means 10240-kb resolution and the last  
79 value in the list, 0.01, means the resolution of final output structure is 10 kb.  
80 “Cell\_1\_10kb\_20replica.pdb” in the command is the name of the output file which includes 20  
81 calculated structure replicas of 10-kb resolution. In the same manner, we generated 20-kb  
82 structure ensemble including 20 conformations by the command as follows:

```
83 ./nuc_dynamics Cell_1_contact.ncc -m 20 -f pdb -o Cell_1_20kb_20replica.pdb -s 10.24 5.12  
84 2.56 1.28 0.64 0.32 0.16 0.08 0.04 0.02 -cpu 20
```

85 , and so on for other resolution structure ensemble calculations.

### 86 **Supplementary Note 2. The process of calculating 3D genome structure by SCL**

87 We use single-cell lattice (SCL) method to reconstruct 3D structure of chromosome 1 of cell 1.  
88 The code is downloaded from website <http://dna.cs.miami.edu/SCL/>. The running command is  
89 `./scl -I ../data/ES_Cell1_chr1.txt -o ../output/ES_cell/chr1/100kb/ES_Cell1_chr1_model -res 0.1`

### 90 **Supplementary Note 3. Computing resources**

91 Cpus of Intel(R) Xeon(R) CPU E5-2692 v2 @ 2.20GHz were used to compare Si-C,  
92 NucDynamics and SCL in terms of computation cost.

93 **Supplementary Note 4. Validating inferred 3D structures using experimental Fluorescence**  
94 ***in situ* hybridization (FISH) data**

95 Beagrie *et al.* used eight FISH probe pairs which are located on chromosomes 3 and 11 of mESC  
96 cells to detect the spatial distances between the regions that are hybridized by a probe pair. The  
97 numbers of sample cells measured by the eight probe pair range from 26 to 119. The median  
98 distance of each pair is chosen to assess the validity of inferred structures. To achieve the aim,  
99 we first identified the beads in inferred structures that are corresponding to the hybridized  
100 regions of each pair. In this study, at a given resolution, we generate a structure ensemble  
101 including 20 conformations for each individual mESC cell. There are eight mESC individual  
102 cells under investigation. Therefore, for each probe pair, we can obtain a total number of 160  
103 distances from inferred structures at a given resolution, and the median value is used to calculate  
104 the correlation with the median spatial distances measured by the FISH experiment. The  
105 correlations for the Si-C structures of 10-kb resolution and 100-kb resolution, as well as the  
106 Nucdynamic structures of 100-kb are calculated, and the Pearson correlation coefficients are  
107 0.889, 0.931, and 0.888, respectively.

108 **Supplementary Note 5. Calculating root mean square deviation (RMSD)**

109 Before assessing the variability within the 3D genome structure ensemble calculated from sparse  
110 single-cell Hi-C data, it should be noted that the reconstructed structures are not well defined,  
111 since there are some genome regions within which no contacts were detected by the single-cell  
112 Hi-C experiments of all 8 cells. We named such regions as void regions. A brief description of  
113 the process of identifying void regions is the following. First, we divided chromosomes into  
114 beads representing 800-kb region of chromosome sequence. Second, we mapped contact reads  
115 derived from the all 8 Hi-C datasets to the beads and identified the beads where no contacts are  
116 observed as void regions. Models of 400-kb, 200-kb, and 100-kb resolutions share void regions  
117 with the 800-kb resolution model. In the same way, we identified void regions in 640-kb and  
118 512-kb resolution models. Therefore, models of (320-kb, 160-kb, 80-kb, 40-kb, 20-kb and 10-kb)  
119 resolutions and (56-kb, 128-kb, 64-kb, 32-kb, 16-kb, 8-kb, 4-kb, 2-kb and 1-kb) resolutions share  
120 the void regions with the 640-kb and 512-kb resolution models, respectively. The void regions  
121 were excluded from the analyses of structural variability between the ensemble members.

122 Root mean square deviation (RMSD) is widely used to measure structural variability. In this  
123 study, we calculated RMSD between conformations within a structural ensemble according to the

124 algorithm reported by Theobald[1], where the RMSD between two conformations is defined as:

$$125 \quad RMSD = \min_{trans+rot} \left\{ \sqrt{\frac{1}{n} \sum_{i=1}^n (\vec{r}_{i,1} - \vec{r}_{i,2})^2} \right\} \quad (S1)$$

126 in which  $\vec{r}_{i,1}$  and  $\vec{r}_{i,2}$  are the coordinates of the  $i^{th}$  bead of the two conformations,  $n$  is the total  
127 number of beads taken into account for the RMSD calculation. The value of RMSD is a  
128 minimum value obtained by optimally aligning the two conformations through translation and  
129 rotation.

130 One problem of structure reconstruction from Hi-C data is that misreconstruction such as  
131 mirror images can not be distinguished by the Hi-C experiment. Although the conformation  
132 appears in the same spatial folding as its mirror image, the RMSD between them would be high.  
133 Therefore, the variability within the ensemble including image-mirror conformations will be  
134 seriously overestimated. To overcome the issue, when calculating the pairwise RMSD between  
135 pair of conformations, denoted as Conformations (1, 2) (the numbering is quite arbitrary), we  
136 firstly constructed a image-mirror structure for Conformation 1, denoted as Conformation 1' and  
137 then calculated RMSD twice, one for Conformations (1, 2), and the other for Conformations (1',  
138 2). The smaller RMSD is retained to describe the variability between Conformation (1, 2).

139 For convenience of the comparisons displayed in Fig. 2d, we set nuclear radius to the unity of  
140 RMSD based on the implicitly assume that intact genome 3D structure of each cell investigated  
141 here is a sphere of the same size. The nuclear radius is defined as the maximum spatial distance  
142 (in the unit of bead diameter) among the distances between every bead and the centroid of all  
143 beads.

144 Code for calculating RMSD is available at:

145 [https://github.com/TheMengLab/Si-C/tree/master/analysis/structure\\_analysis/analysis/align/rmsd](https://github.com/TheMengLab/Si-C/tree/master/analysis/structure_analysis/analysis/align/rmsd)

### 146 **Supplementary Note 6. Translating calculated 3D genome structure to distance matrix**

147 For each calculated 3D genome structure, one can measure the spatial distance between each pair  
148 of beads in the 3D structure and translate the structure into a distance matrix where matrix  
149 element represent the spatial distance between corresponding beads in the 3D genome structure.  
150 It should be noted that the value of matrix element of each distance matrix shown in Fig. 2f and  
151 3a is computed by averaging the distance between each pair of beads across the whole 20  
152 members of the same structure ensemble.

153 **Supplementary Note 7. Identifying boundaries of domain structures in distance matrix and**  
154 **boundaries of TADs in the populated Hi-C data**

155 Separation score is used to quantify the degree of separating the upstream and downstream  
156 chromatin regions of one specific sequence position. The separation score is calculated from the  
157 distance matrix. Specifically, the separation score of each position is computed by averaging all  
158 the spatial distances between any pair of positions separately located in the two 500 kb regions  
159 on either side of the position. Code for Separation Score calculation is available at:  
160 [https://github.com/TheMengLab/Si-C/tree/master/analysis/structure\\_analysis/analysis/align/sepscore\\_g](https://github.com/TheMengLab/Si-C/tree/master/analysis/structure_analysis/analysis/align/sepscore_g)  
161 [yr](#)

162 The positions that are identified as boundaries of domain structures in distance matrix should  
163 stratify two criteria. First, the boundary position should have higher separation score than any  
164 other positions within the 400 kb regions on either side of the position. Second, the separation  
165 score of each position within the region under investigation can be calculated and their average  
166 separation score can be obtained immediately. The boundary position should be higher than the  
167 average separation score. The code for identifying boundary position in distance matrix is  
168 available at:  
169 [https://github.com/TheMengLab/Si-C/tree/master/analysis/structure\\_analysis/analysis/align/sepscore\\_g](https://github.com/TheMengLab/Si-C/tree/master/analysis/structure_analysis/analysis/align/sepscore_g)  
170 [yr/boundary\\_chr](#)

171 The population Hi-C data shown in Fig. 3c and 3e is downloaded from Gene Expression  
172 Omnibus (GEO) repository with accession code GSE35156. The process for the identification of  
173 TAD boundaries in the populated Hi-C data includes the following steps:

174 (1) Converting the reference genome of Hi-C data from NCBI37/mm9 to GRCm38/mm10.

175 (2) All chromosome chains are divided into beads of 10-kb size and all Hi-C contact reads  
176 are assigned to pairs of beads containing the corresponding restriction fragment ends. After  
177 mapping, Hi-C data is presented in three columns, one of which lists the count of contact reads  
178 and the other two columns display the genome positions corresponding to the restriction  
179 fragment ends of contact reads.

180 (3) Normalizing the Hi-C data by using iterative correction and eigenvector decomposition  
181 (ICE) algorithm. The Hi-C data for individual chromosome is normalized, respectively.

182 (4) Converting the format of normalized Hi-C data from the form of three columns to the  
183 matrix format.

184 (5) Using TopDom method[3] (version 0.0.2) to identify the TAD boundaries in each  
185 chromosome. A window size of 10 is used in the identification process.

### 186 **Supplementary Note 8. Calculation of chromosome intermingling**

187 To assess the degree of intermingling between chromosomes, we first identified intermingled  
188 beads within each chromosome and then calculated the proportion of intermingled beads to the  
189 total beads of the chromosome. The intermingled beads were defined as those that surrounded by  
190 at least four other beads from a different chromosome within a distance threshold between beads  
191 of 2 bead diameters.

### 192 **Supplementary Note 9. Identification of A/B compartment and features of large-scale 3D 193 structure of the genome**

194 The identification of chromosome compartment is calculated following a similar algorithm  
195 described in the previous work [4]. In the calculation process, we first normalized the Hi-C  
196 contact frequency matrix through dividing each matrix element by the genome-wide average  
197 contact frequency for bin pairs at the same genomic distance. Then we calculated the correlation  
198 matrix  $\mathbf{M}$ , in which the element  $M_{ij}$  describes the Pearson correlation between the  $i^{\text{th}}$  and  $j^{\text{th}}$  rows  
199 of the normalized Hi-C matrix generated in the first step. Based on the correlation matrix  $\mathbf{M}$ ,  
200 each chromosome was partitioned into two types of regions according to the first principal  
201 component generated by principal component analysis. Between these two types of regions, the  
202 one with higher overlap with the H3K4me3 enriched regions was defined as compartment A and  
203 the other one was defined as compartment B.

204 The script is available at: <https://github.com/TheMengLab/Si-C/tree/master/analysis/compartment>

205 Supplementary Fig.2 displays several features of 3D genome architecture for Cells 2-8.  
206 Supplementary Fig.3 shows the locations of centromeres and telomeres in the nucleus for the all  
207 eight cells.

### 208 **Supplementary Note 10. Calculating gyration radius for chromatin region**

209 We estimated the degree of compaction of investigated regions of 200 kb using the gyration  
210 radius ( $R_g$ ) which is defined as the following:

$$211 \quad R_g = \sqrt{\frac{1}{N} \sum_{i=1}^N (\vec{r}_i - \vec{r}_{ave})^2} \quad (\text{S2})$$

212 in which  $N$  represents the number of beads in the 200 kb region under investigation,  $\vec{r}_i$  the

213 coordinate of the  $i^{th}$  bead in the region and  $\vec{r}_{ave}$  is the coordinate of the centroid of the region. In  
 214 this study, the value of N is 20 because the region of 200 kb is represented by beads of 10-kb  
 215 size.

216 The script for calculating gyration radius is available at:  
 217 [https://github.com/TheMengLab/Si-C/tree/master/analysis/structure\\_analysis/analysis/align/sepscore\\_gyr](https://github.com/TheMengLab/Si-C/tree/master/analysis/structure_analysis/analysis/align/sepscore_gyr)  
 218 [yr](#)

219 **Supplementary Table 1. Source list of experimental data and pre-calculation**

220 The experimental data used in our analysis was taken from previously published work, as  
 221 elaborated below:

| Data type                             | Accession number | Reference                                                                                                                                                              |
|---------------------------------------|------------------|------------------------------------------------------------------------------------------------------------------------------------------------------------------------|
| H3K4me3 ChIP-seq (haploid)            | GSE80280         | Stevens, T.J. et al. 3D structures of individual mammalian genomes studied by single-cell Hi-C. <i>Nature</i> <b>544</b> , 59-+ (2017).                                |
| Constitutive Lamina Associated Domain | GSE17051         | Peric-Hupkes, D. et al. Molecular Maps of the Reorganization of Genome-Nuclear Lamina Interactions during Differentiation. <i>Mol Cell</i> <b>38</b> , 603-613 (2010). |
| Replication Timing                    | E-MTAB-3506      | Kolesnikov, N. et al. ArrayExpress update-simplifying data submissions. <i>Nucleic Acids Res</i> <b>43</b> , D1113-D1116 (2015).                                       |
| Populated Hi-C data                   | GSE35156         | Dixon, J.R. et al. Topological domains in mammalian genomes identified by analysis of chromatin interactions. <i>Nature</i> <b>485</b> , 376-380 (2012).               |
| Loop anchors                          |                  | Dixon, J.R. et al. Topological domains in mammalian genomes identified by analysis of chromatin                                                                        |



|              |  |                                                                                                                                                                         |
|--------------|--|-------------------------------------------------------------------------------------------------------------------------------------------------------------------------|
|              |  | interactions. <i>Nature</i> <b>485</b> , 376-380 (2012).                                                                                                                |
| 3D FISH data |  | Beagrie, R. A. <i>et al.</i> Complex multi-enhancer contacts captured by genome architecture mapping. <i>Nature</i> <b>543</b> , 519+, doi:10.1038/nature 21411 (2017). |

222

223

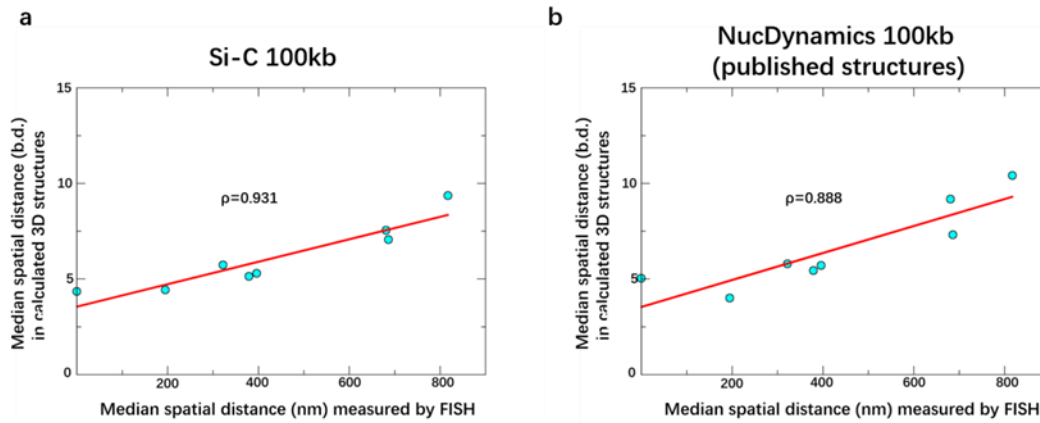

224

225 **Supplementary Fig. 1: Correlation between the median spatial distances measured by eight**  
 226 **3D FISH probe pairs (from ref. 2) and the median distances of the corresponding pairs in**  
 227 **the Si-C 100-kb structures (a) and in the published NucDynamics 100-kb structures (b).**

228

229

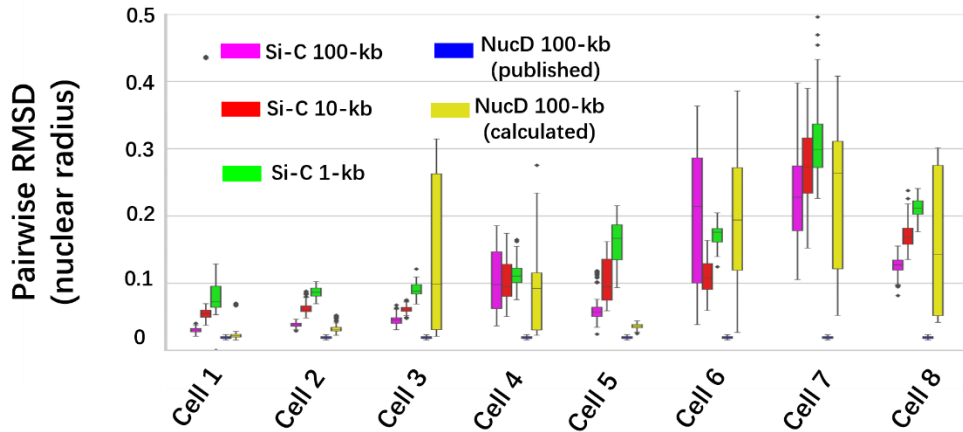

230

231 **Supplementary Fig. 2: Comparison of pairwise RMSD for different structure ensembles.**

232 Boxplot of pairwise RMSDs within the Si-C ensembles at 100-kb (purple), 10-kb (red), and 1-kb  
 233 (green) resolutions along with pairwise RMSDs within the published NucDynamics ensembles  
 234 (blue) [structures downloaded from GEO with accession code GSE80280] and the calculated  
 235 NucDynamics ensembles (yellow). Median values are shown by black bars. Boxes represent the  
 236 range from the twenty-fifth to the seventy-fifth percentile. The whiskers represent 1.5 times of  
 237 the inner quartile range. For each structure ensemble generated by Si-C, 20 structure replicas are  
 238 used in the statistical analysis. For structure ensemble downloaded from GEO, 10 structure  
 239 replicas are used. For calculated NucDynamics ensemble, 20 structure replicas are used

240

241

242

243

244

245

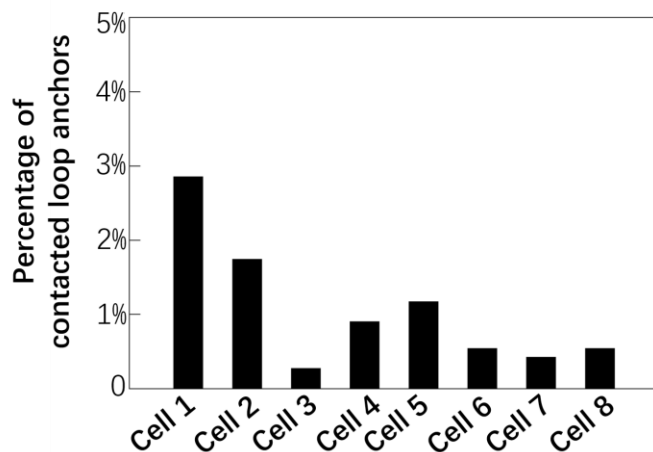

246

247 **Supplementary Fig. 3: Plot of the percentage of loops that are formed in the Si-C inferred**

248 **structures of 10-kb resolution.** The information of the loops is obtained from the published data  
249 (data source is listed in Supplementary Note 11).

250

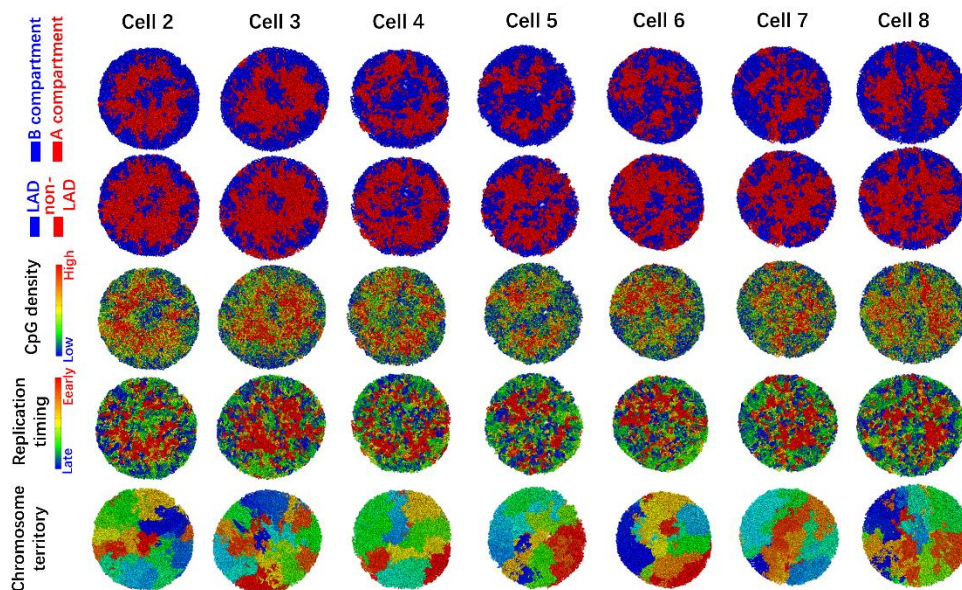

252 **Supplementary Fig. 4: Cross-sections of the Si-C intact genome 3D 10-kb resolution**  
253 **structures of Cell 2-8.** Colored according to whether the sequence is in the A (red) or B (blue)  
254 compartment (first column); whether the sequence is part of a lamina associated domain (LAD)  
255 (blue) or not (red) (second column); the CpG density from red to blue (high to low) (third  
256 column); the replication time in the DNA duplication process from red to blue (early to late)  
257 (fourth column).

258

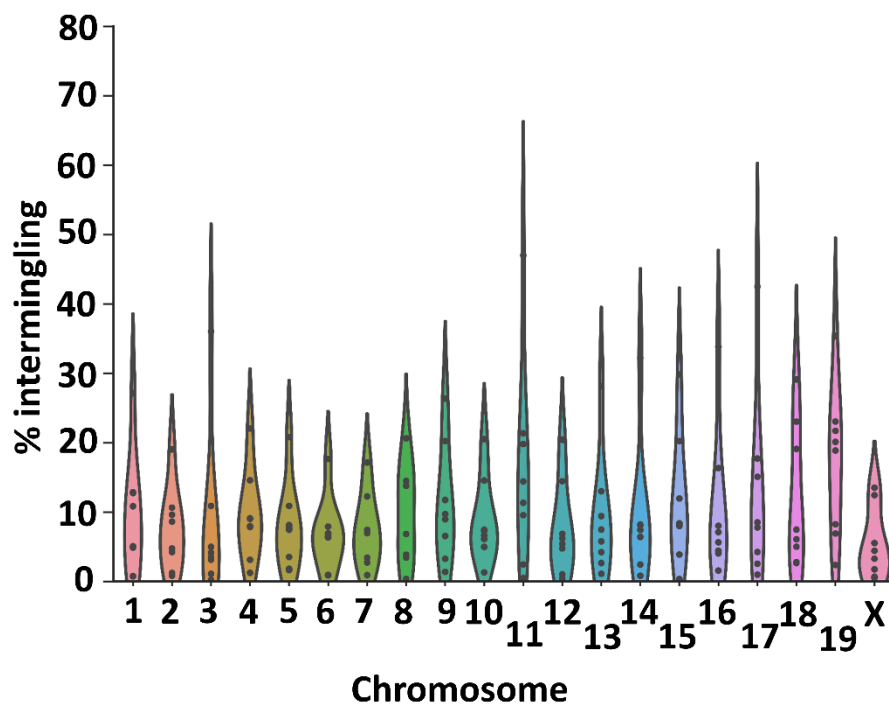

259 **Supplementary Fig. 5: Violin plot showing the proportion of each chromosome that**  
 260 **intermingles with other chromosomes.** The proportion is derived from the Si-C 10-kb  
 261 resolution structures of the eight G1-phase ES cells,  
 262  
 263

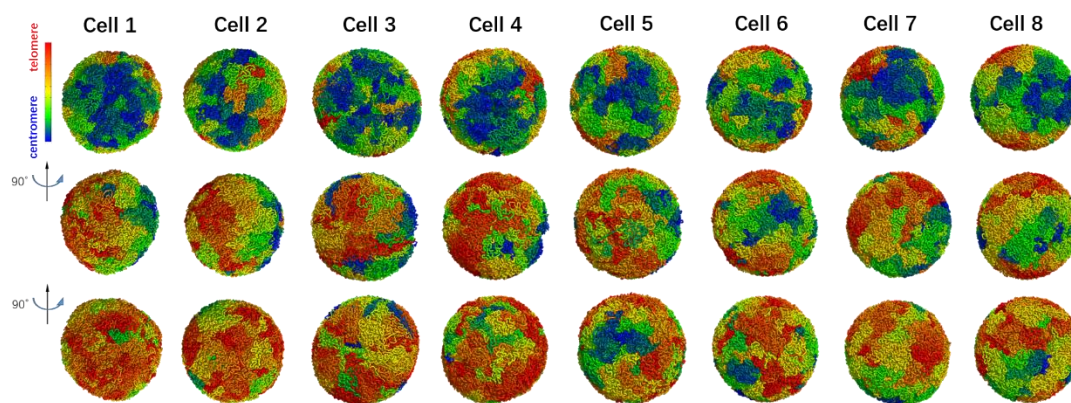

264 **Supplementary Fig. 6: The locations of centromeres and telomeres in the Si-C intact**  
 265 **genome 3D 10-kb resolution structures for the all eight individual cells.** A consistent Rab1  
 266 configuration (with centromeres and telomeres clustered on opposite sides of the nucleus) are  
 267 shown in all G1-phase ES cells, strongly validating the Si-C 10-kb resolution structures.  
 268  
 269

270 **Supplementary References**

271

272 1. Theobald, D.L. Rapid calculation of RMSDs using a quaternion-based characteristic polynomial.

273 *Acta Crystallogr A* **61**, 478-480 (2005).

274 2. Beagrie, R. A. *et al.* Complex multi-enhancer contacts captured by genome architecture mapping.

275 *Nature* **543**, 519-+, doi:10.1038/nature21411 (2017).

276 3. Shin, H.J. *et al.* TopDom: an efficient and deterministic method for identifying topological

277 domains in genomes. *Nucleic Acids Res* **44** (2016).

278 4. Lieberman-Aiden, E. *et al.* Comprehensive Mapping of Long-Range Interactions Reveals Folding

279 Principles of the Human Genome. *Science* **326**, 289-293 (2009).
